# Supplementary material for: Proton donor modulating ESIPT-based fluorescent probes for highly sensitive and selective detection of Cu2+
Source: Royal Society of Chemistry journal article supplement (doi:10.1039/c5ra14443d), 2015-01-01
Supplement: c5ra14443d1.pdf [file c5ra14443d1.pdf]

## Supplementary Information

### **Proton donor modulating ESIPT-based fluorescent probes for highly sensitive and selective detection of Cu<sup>2+</sup>**

*Liyan Huang, Biao Gu, Wei Su, Peng Yin, Haitao Li\**

Key Laboratory of Chemical Biology and Traditional Chinese Medicine Research (Ministry of Education), College of Chemistry and Chemical Engineering, Hunan Normal University, Changsha 410081, PR China

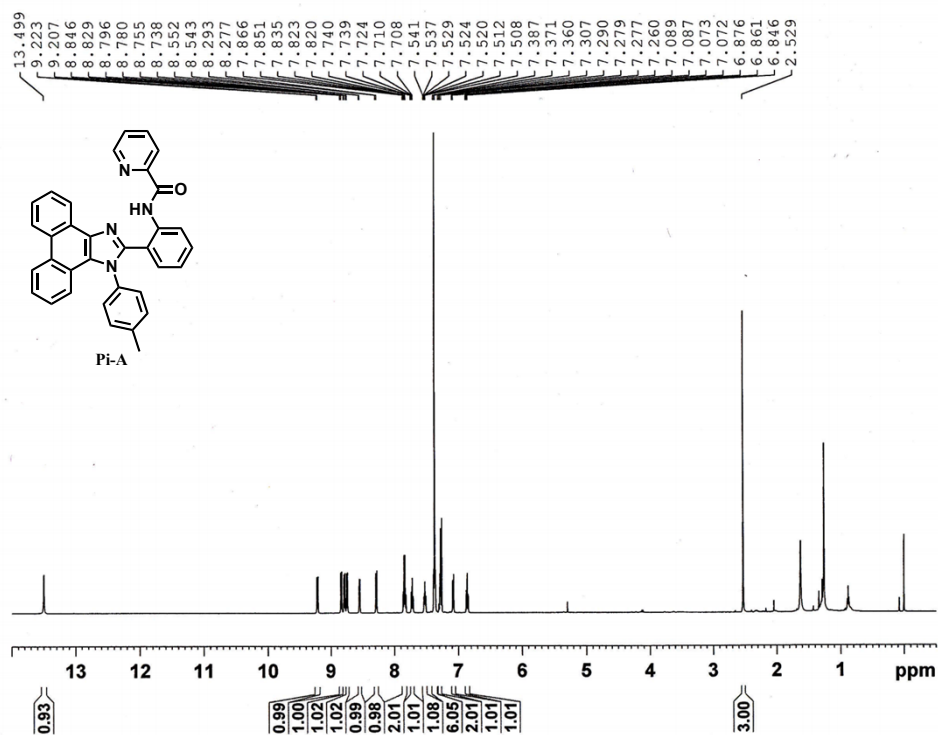

Fig. S1. <sup>1</sup>H NMR spectrum of Pi-A (500 MHz, CDCl<sub>3</sub>).

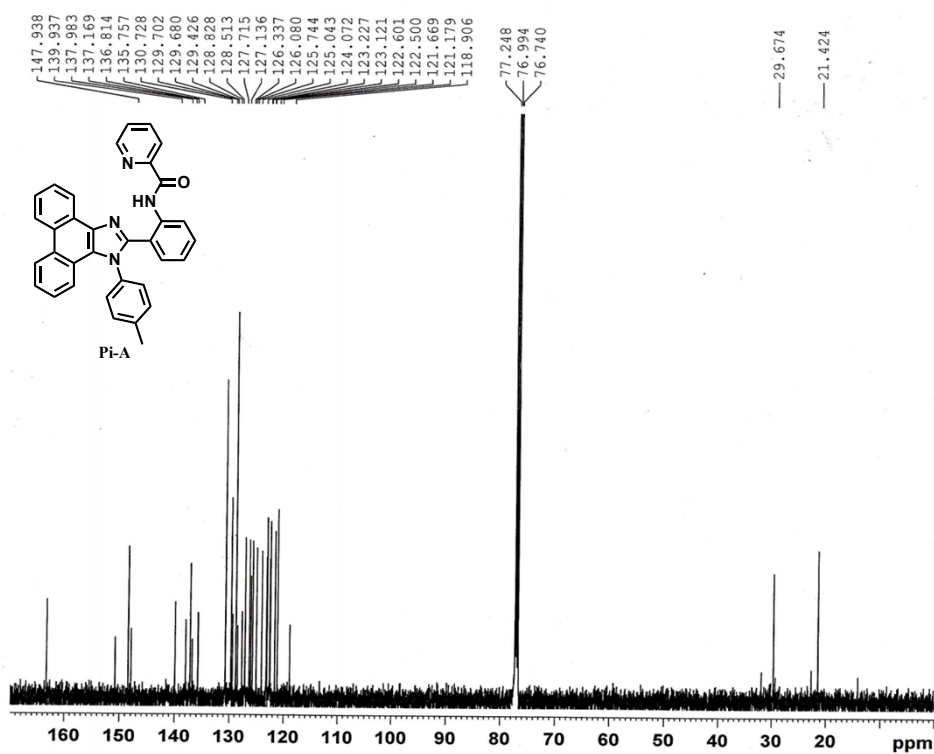

Fig. S2. <sup>13</sup>C NMR spectrum of Pi-A (126 MHz, CDCl<sub>3</sub>).

20150108GU 165 (1.663) Cm (132:216)

Scan ES+  
3.38e6

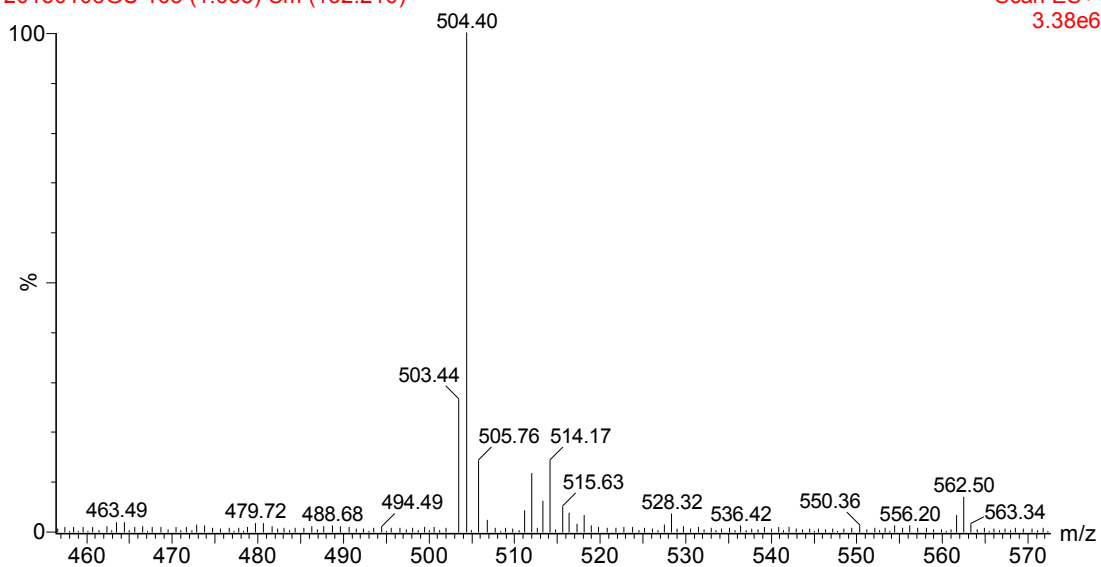

Fig. S3. ESI-MS spectrum of Pi-A.

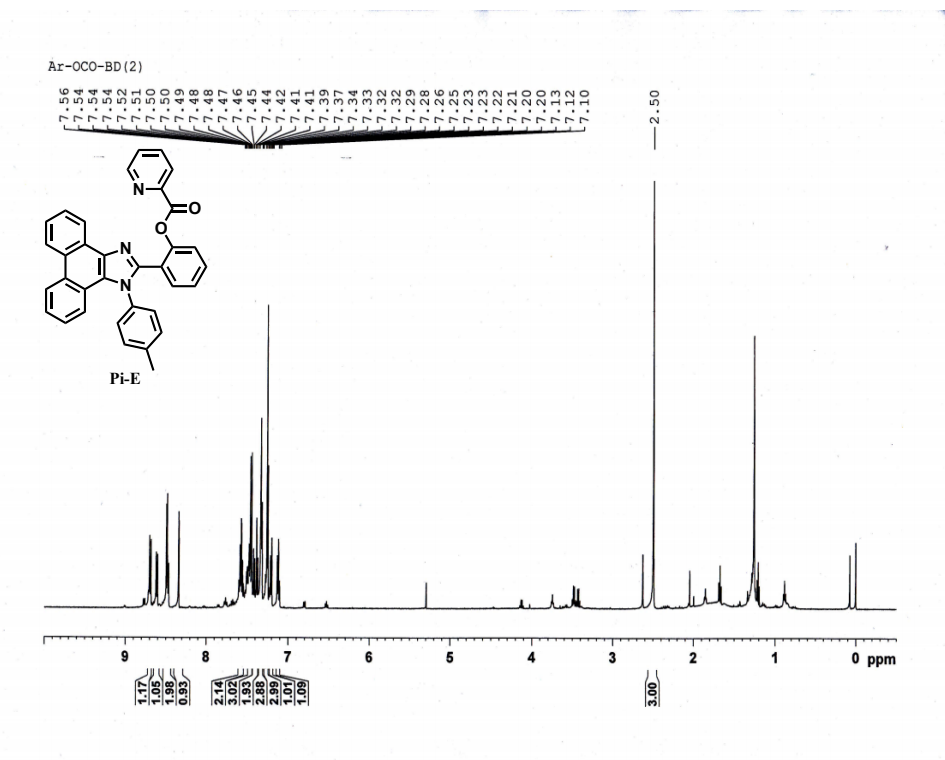

Fig. S4. <sup>1</sup>H NMR spectrum of Pi-E (500 MHz, CDCl<sub>3</sub>).

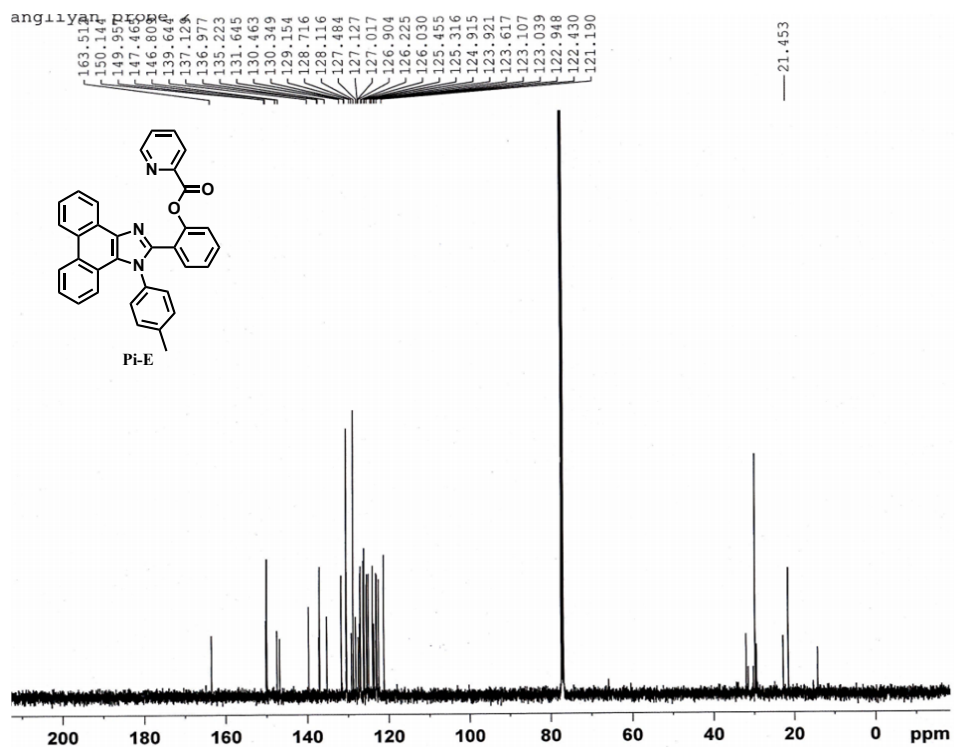

Fig. S5.  $^{13}\text{C}$  NMR spectrum of Pi-E (126 MHz,  $\text{CDCl}_3$ ).

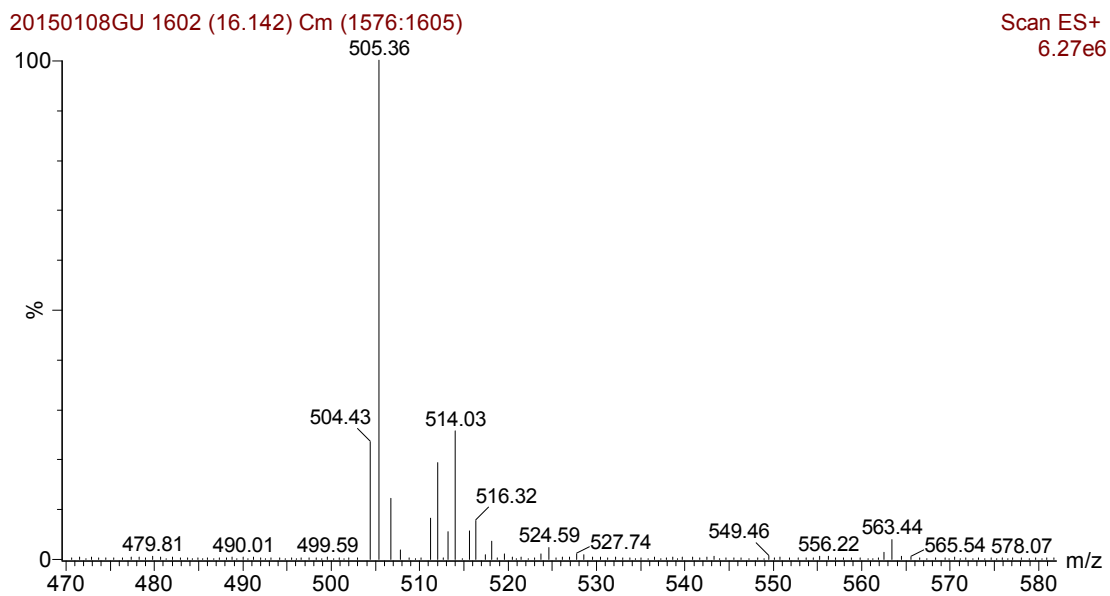

Fig. S6. ESI-MS spectrum of Pi-E.

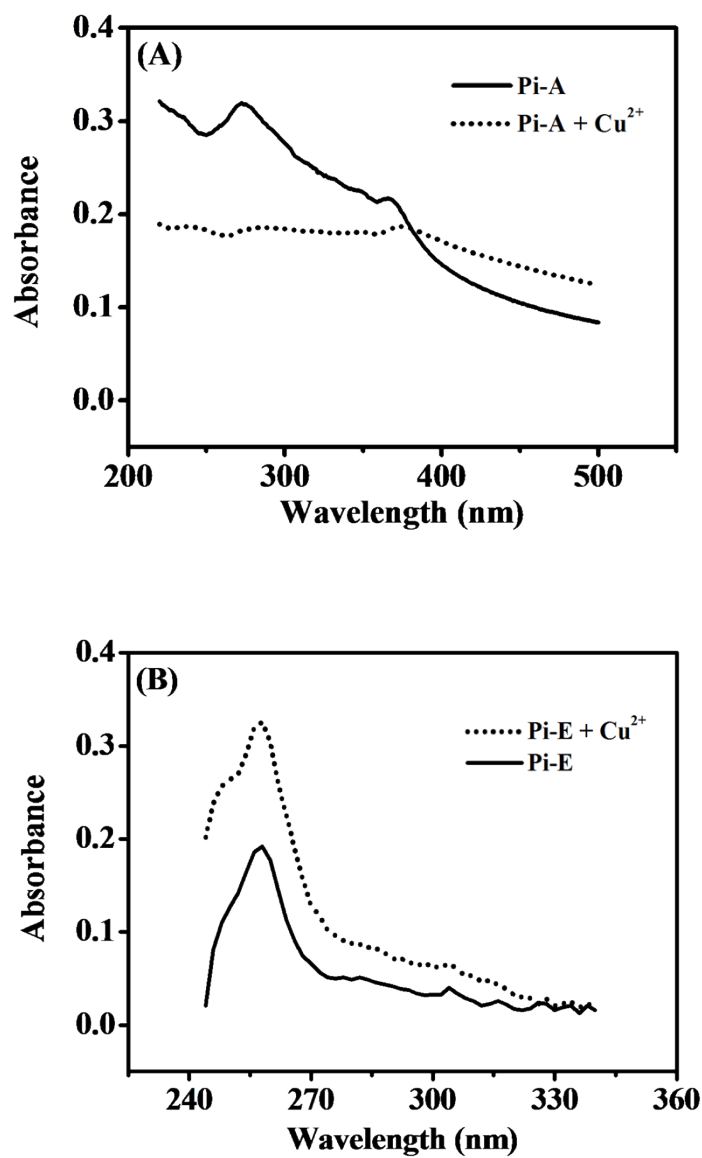

**Fig. S7.** Absorption spectra of 10  $\mu\text{M}$  Pi-A (A) and Pi-E (B) in the absence and presence of 10  $\mu\text{M}$   $\text{Cu}^{2+}$ . Buffer: Tris-HCl (10 mM, pH 7.4), 2% (v/v) DMSO/water.

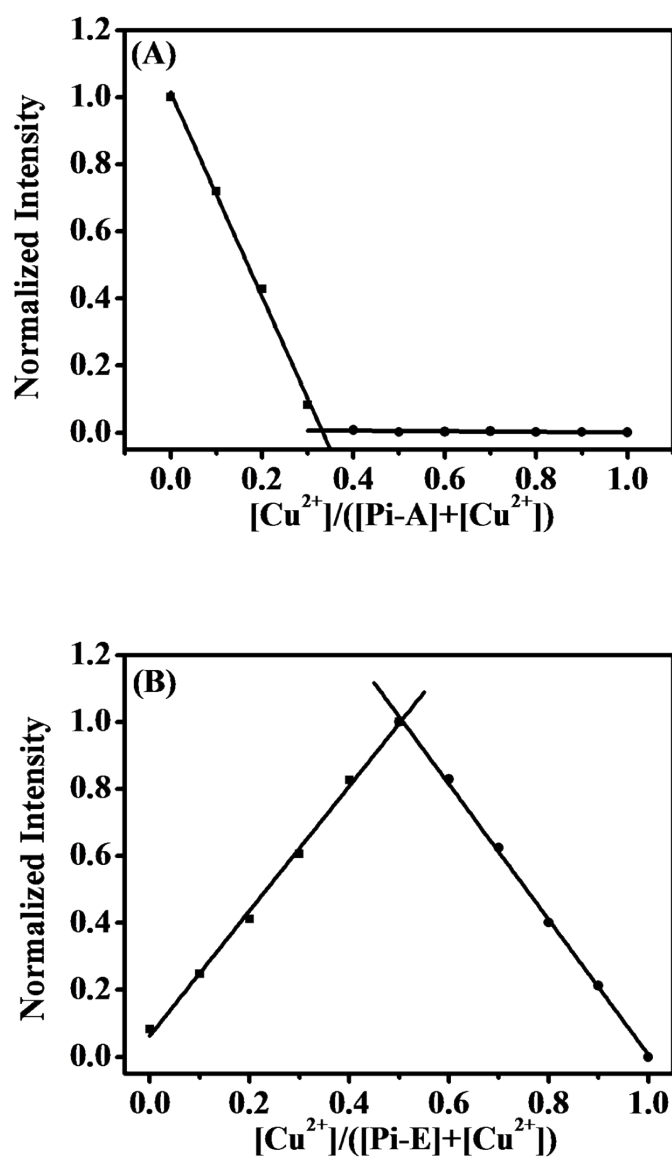

**Fig. S8.** (A) Job's plot of Pi-A and  $\text{Cu}^{2+}$  ( $[\text{Pi-A}] + [\text{Cu}^{2+}] = 10 \mu\text{M}$ ) and (B) Job's plot of Pi-E and  $\text{Cu}^{2+}$  ( $[\text{Pi-E}] + [\text{Cu}^{2+}] = 10 \mu\text{M}$ ). Buffer: Tris-HCl (10 mM, pH 7.4), 2% (v/v) DMSO/water.

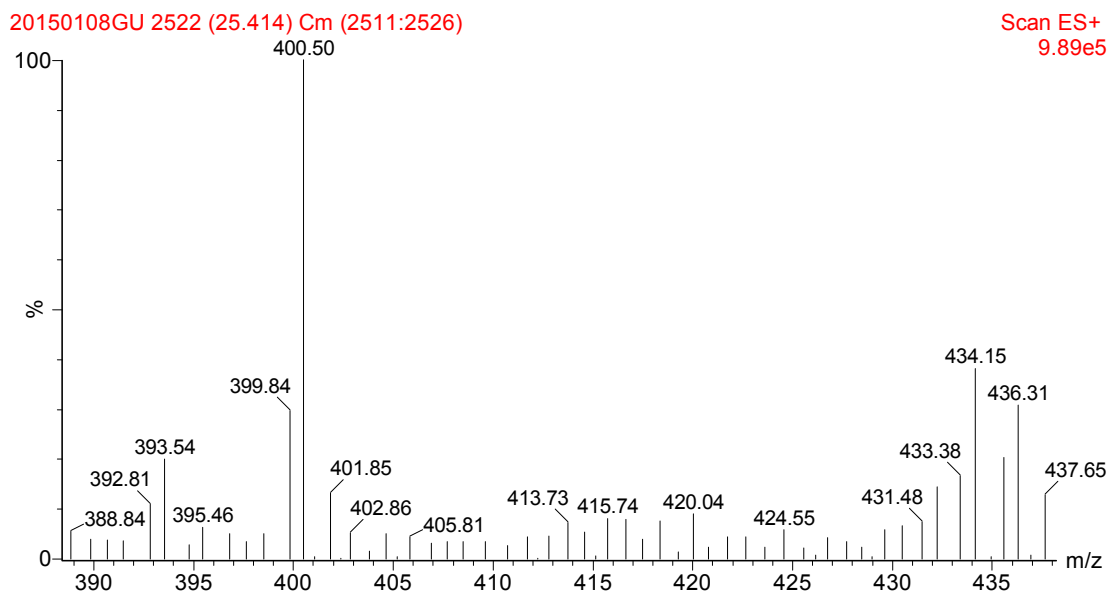

Fig. S9. ESI-MS spectrum of the reaction products of Pi-E with Cu<sup>2+</sup>.

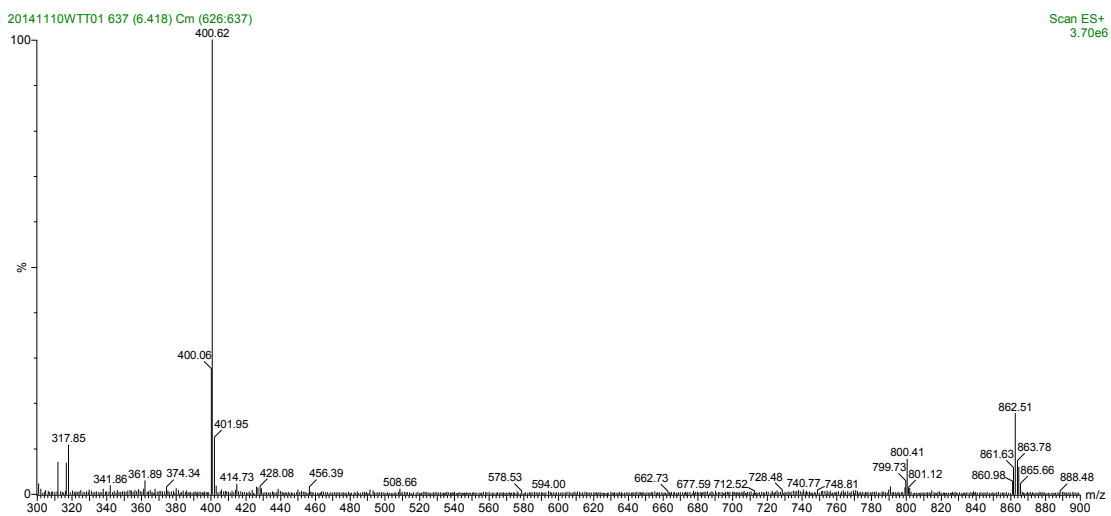

Fig. S10. ESI-MS spectrum of compound 2.

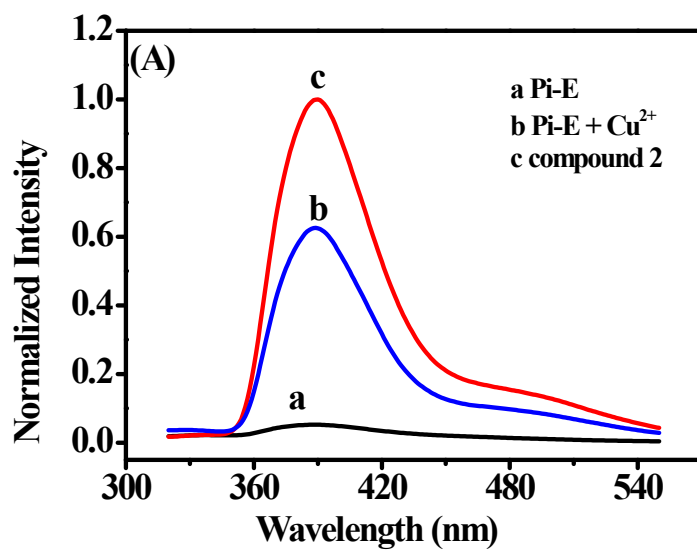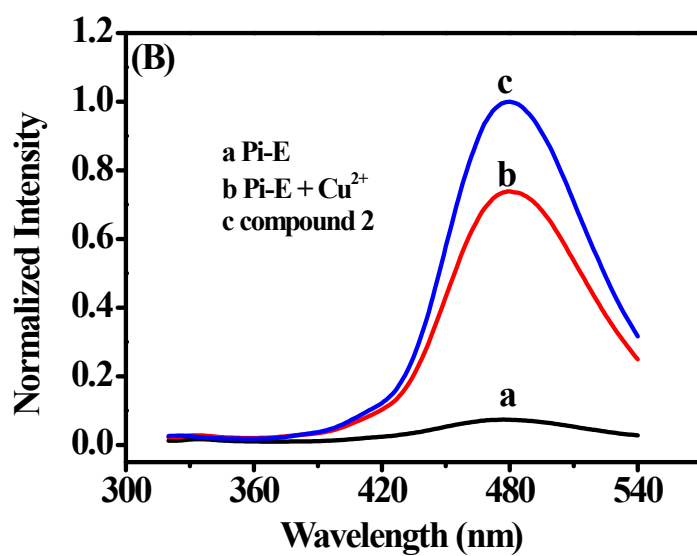

**Fig. S11.** Fluorescence spectra of 10  $\mu$ M Pi-E (a), 10  $\mu$ M Pi-E with 10  $\mu$ M Cu<sup>2+</sup> (b) and 10  $\mu$ M compound 2 (c). Conditions: (A) in DMSO/Tris-HCl (v/v = 9:1) solution,  $\lambda_{ex}/\lambda_{em}$  = 296/389 nm; (B) in DMSO/Tris-HCl (v/v = 1:49) solution at pH 7.4.  $\lambda_{ex}/\lambda_{em}$  = 296/481 nm.



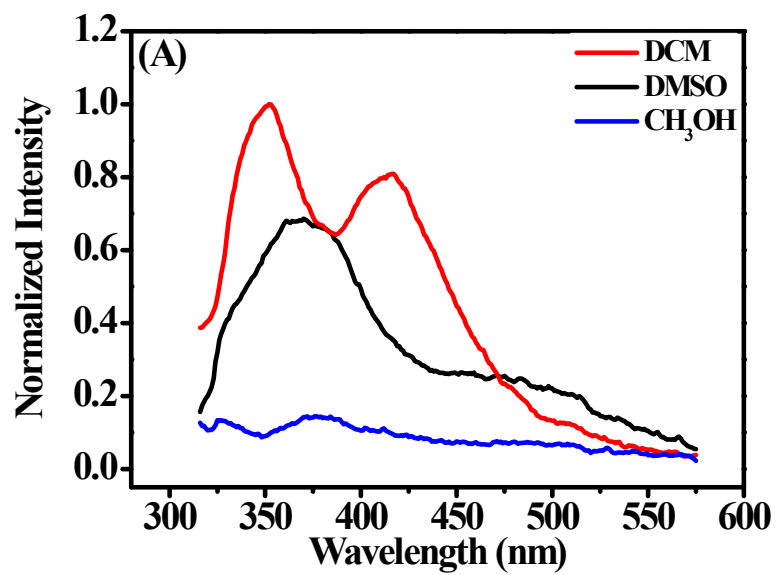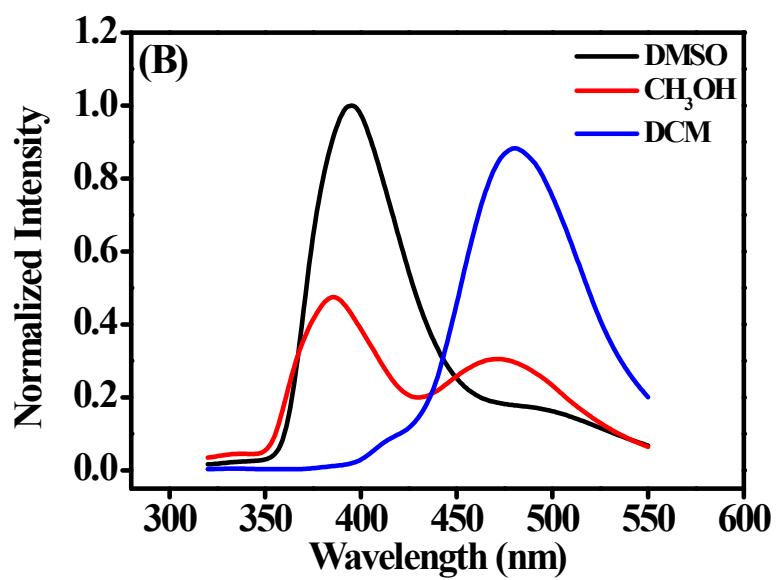

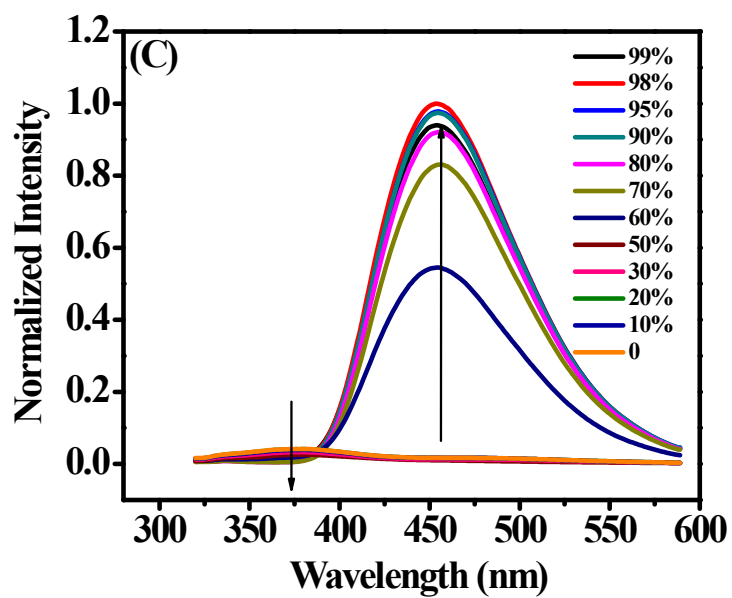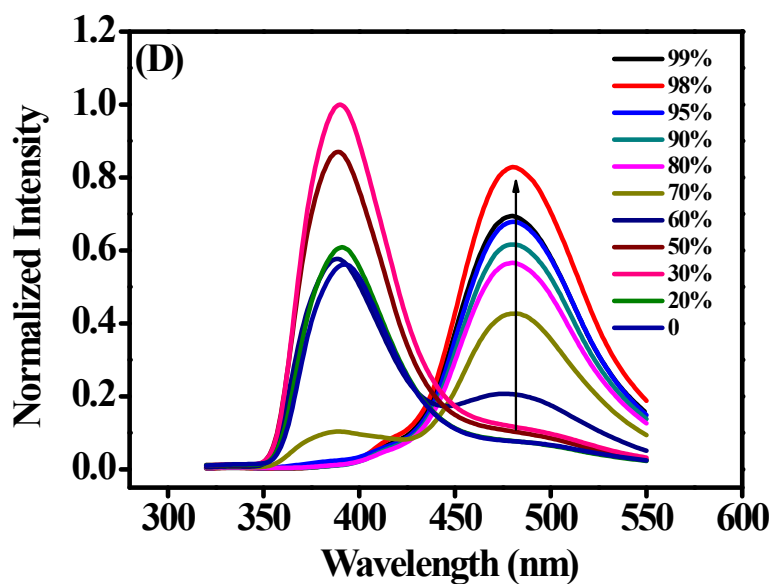

**Fig. S12.** Fluorescence spectra of 10  $\mu\text{M}$  Pi-A (A) or compound **2** (B) in different solvents. Fluorescence spectra of 10  $\mu\text{M}$  Pi-A (C) or compound **2** (D) in DMSO/water mixture of varying water proportions from 0 to 99%.  $\lambda_{\text{exc}} = 296$  nm.

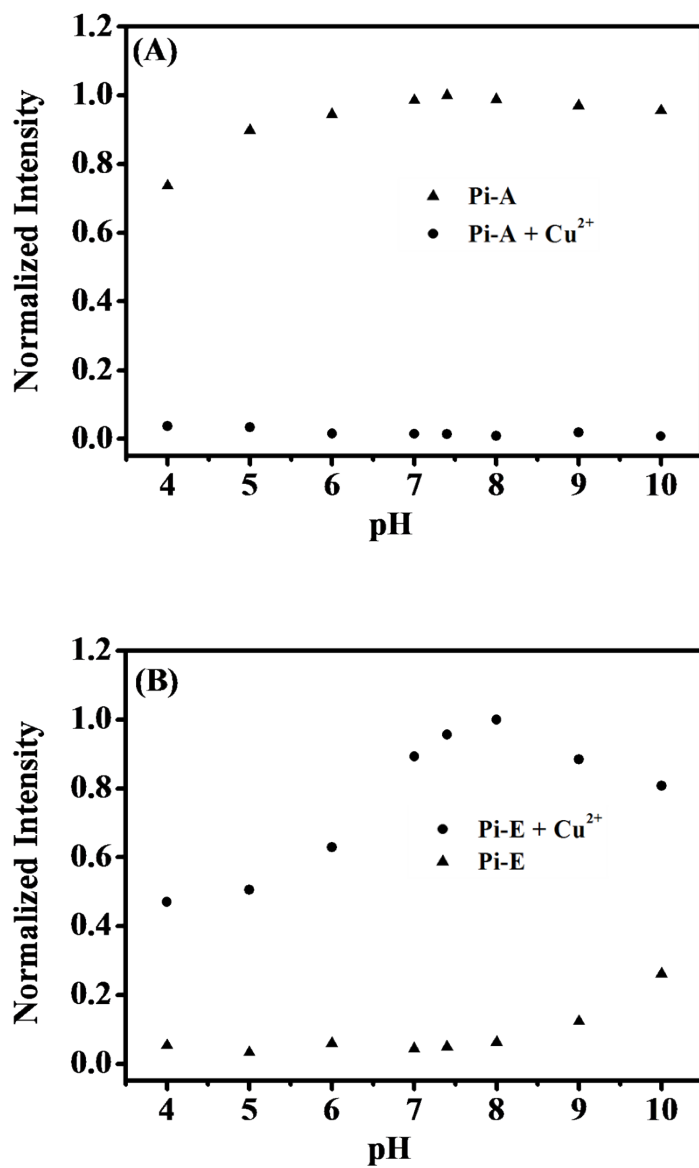

**Fig. S13.** Effect of pH on the fluorescence intensity of 10  $\mu\text{M}$  Pi-A (A) and Pi-E (B) in the absence and presence of 10  $\mu\text{M}$   $\text{Cu}^{2+}$ . Buffer: 10 mM NaAc-HAc for pH 4.0-6.0 and 10 mM Tris-HCl buffer for pH 7.0-10.0. Conditions: for Pi-A,  $\lambda_{\text{ex}}/\lambda_{\text{em}} = 296/455$  nm; for Pi-E,  $\lambda_{\text{ex}}/\lambda_{\text{em}} = 296/481$  nm.

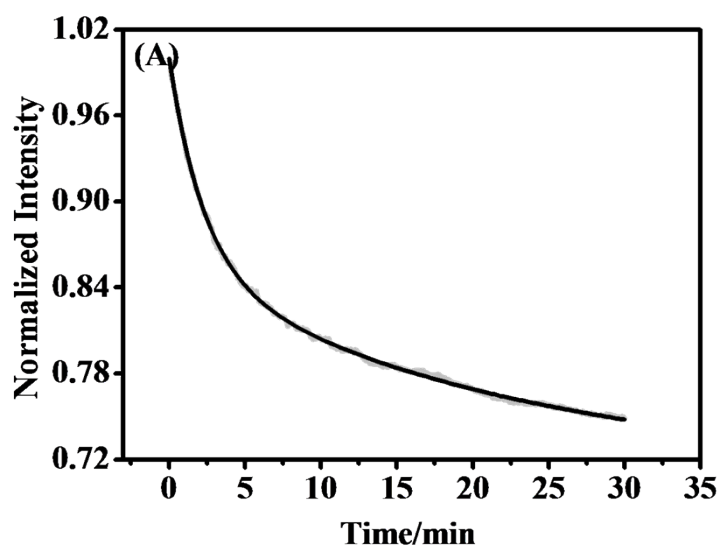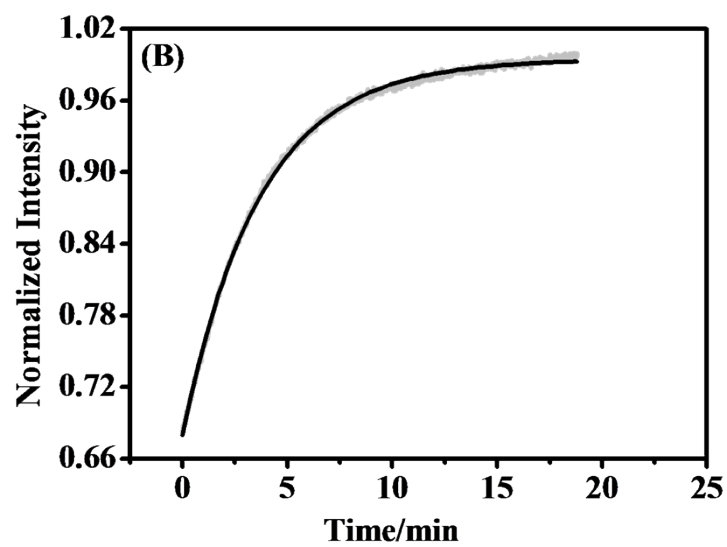

**Fig. S14.** Time-dependent fluorescence intensity of 10  $\mu\text{M}$  Pi-A (A) and Pi-E (B) in the presence of 10  $\mu\text{M}$   $\text{Cu}^{2+}$ . Conditions: for Pi-A,  $\lambda_{\text{ex}}/\lambda_{\text{em}} = 296/455$  nm; for Pi-E,  $\lambda_{\text{ex}}/\lambda_{\text{em}} = 296/481$  nm. Buffer: Tris-HCl (10 mM, pH 7.4), 2% (v/v) DMSO/water. T= 25 °C.

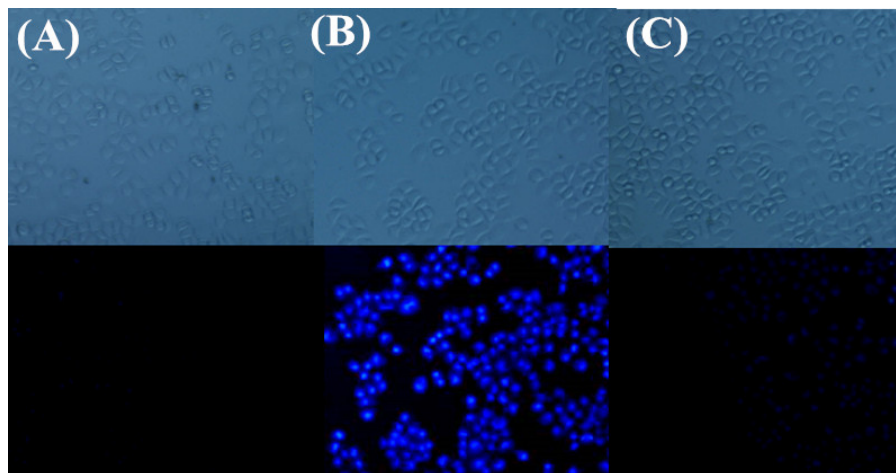

**Fig. S15.** Fluorescence microscope images of living HeLa cells. Cells incubated with PBS (A); 10  $\mu$ M Pi-A (B); 10  $\mu$ M Pi-E (C) for 30 min at 37 °C. Top: bright field image, Bottom: fluorescence image.
